# Supplementary material for: Enhancing LPG Adoption in Ghana (ELAG): A Trial Testing Policy-Relevant Interventions to Increase Sustained Use of Clean Fuels
Source: PubMed Central journal article supplement (PMC8580155; doi:10.3390/su13042213), 2021-02-19
Supplement: NIHMS1730609-supplement-Supplementary_material.pdf [file NIHMS1730609-supplement-Supplementary_material.pdf]

Enhancing LPG Adoption in Ghana (ELAG): A trial testing policy-relevant interventions to increase sustained use of clean fuels

**Supplementary materials**

Carrión, et al.

**Figure S1:** Map of the study region.

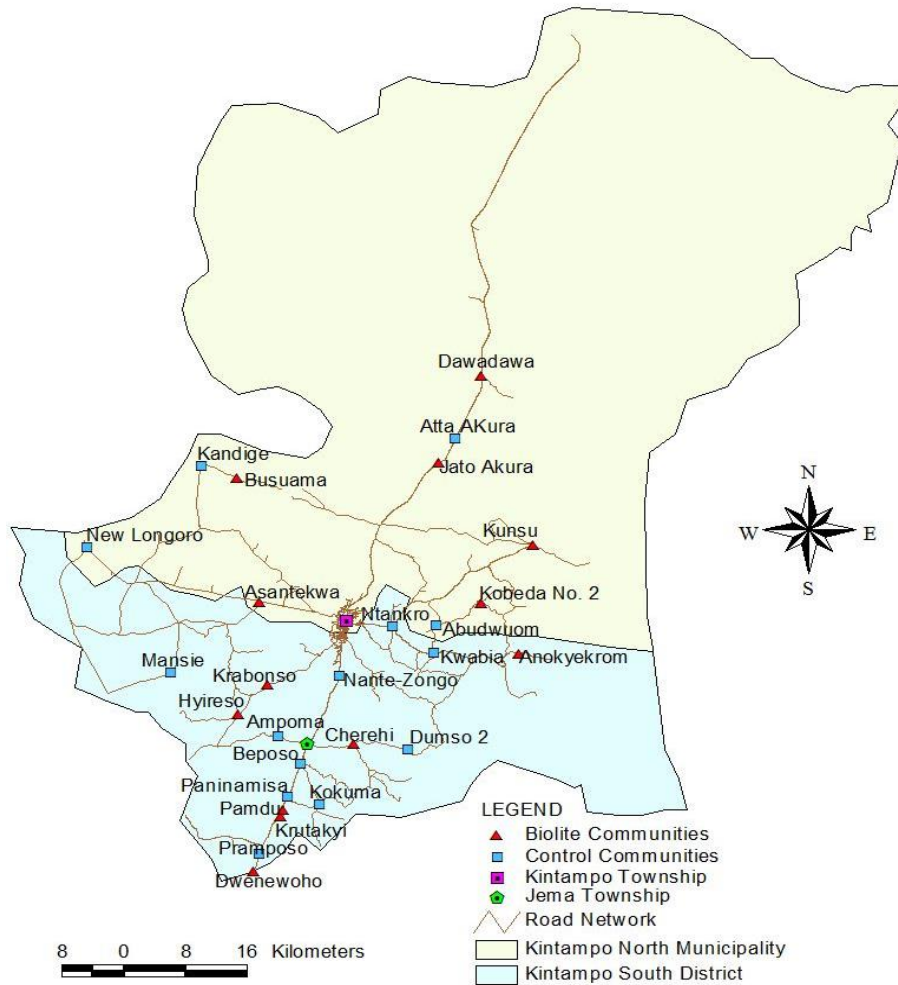

**Table S1:** Prognostic covariates included in cluster-randomization procedure.

| Variable                      | Rationale                                                                                                                                                                                                                        |
|-------------------------------|----------------------------------------------------------------------------------------------------------------------------------------------------------------------------------------------------------------------------------|
| Community Asset Index         | Studies have shown that differential access to resources can be predictive in the uptake of new cookstove technologies [41,42].                                                                                                  |
| Average Household Size        | Studies have shown that household size can be predictive in the uptake of new cookstove technologies [41,42].                                                                                                                    |
| Distance to Refueling Station | Participant communities are scattered throughout the region at varying distances from the refueling center. Further distances are likely a deterrent to refuel for non-Agent delivery households, <b>Supplemental Figure 1</b> . |
| Households per cluster        | To ensure roughly equal number of participating households per arm.                                                                                                                                                              |

**Table S2:** Missingness by arm. Participants for whom there are at least 30 days' worth of stove use monitoring data.

|                                                   | Control | RANAS Education | Direct Delivery | Dual  |
|---------------------------------------------------|---------|-----------------|-----------------|-------|
| <b>Participants with 30+ days of observations</b> | 201     | 184             | 155             | 140   |
| <b>Total enrolled</b>                             | 217     | 196             | 193             | 172   |
| <b>Percent for main analysis</b>                  | 92.6%   | 93.9%           | 80.3%           | 81.4% |

**Table S3:** Characteristics of participants with less than one month's worth of data in the latter six-month period.

|                                        | Missing<br>(N=98) | Not Missing<br>(N=680) | Total<br>(N=778) | p value |
|----------------------------------------|-------------------|------------------------|------------------|---------|
| <b>Participant's Age</b>               |                   |                        |                  | 0.049   |
| Mean (SD)                              | 30.1 (7.2)        | 31.6 (7.3)             | 31.4 (7.3)       |         |
| <b>Ethnicity</b>                       |                   |                        |                  | 0.312   |
| Akan                                   | 27 (27.6%)        | 150 (22.1%)            | 177 (22.8%)      |         |
| Other                                  | 15 (15.3%)        | 97 (14.3%)             | 112 (14.4%)      |         |
| Grushi                                 | 10 (10.2%)        | 51 (7.5%)              | 61 (7.8%)        |         |
| Dagarti                                | 28 (28.6%)        | 184 (27.1%)            | 212 (27.2%)      |         |
| Mo                                     | 11 (11.2%)        | 105 (15.4%)            | 116 (14.9%)      |         |
| Konkomba                               | 7 (7.1%)          | 93 (13.7%)             | 100 (12.9%)      |         |
| <b>Religion</b>                        |                   |                        |                  | 0.705   |
| Christian                              | 71 (72.4%)        | 480 (70.6%)            | 551 (70.8%)      |         |
| Non-Christian                          | 27 (27.6%)        | 200 (29.4%)            | 227 (29.2%)      |         |
| <b>Household size</b>                  |                   |                        |                  | < 0.001 |
| 2-5 persons                            | 53 (54.1%)        | 217 (31.9%)            | 270 (34.7%)      |         |
| 6-10 persons                           | 41 (41.8%)        | 374 (55.0%)            | 415 (53.3%)      |         |
| More than 10 persons                   | 4 (4.1%)          | 89 (13.1%)             | 93 (12.0%)       |         |
| <b>Profession</b>                      |                   |                        |                  | 0.352   |
| Professional                           | 0 (0.0%)          | 5 (0.9%)               | 5 (0.8%)         |         |
| Secretarial                            | 0 (0.0%)          | 0 (0.0%)               | 0 (0.0%)         |         |
| Trader                                 | 26 (32.1%)        | 207 (36.1%)            | 233 (35.6%)      |         |
| Seamstress                             | 4 (4.9%)          | 39 (6.8%)              | 43 (6.6%)        |         |
| Farmer                                 | 50 (61.7%)        | 321 (56.0%)            | 371 (56.7%)      |         |
| Other                                  | 1 (1.2%)          | 1 (0.2%)               | 2 (0.3%)         |         |
| <b>Participant's Education (years)</b> |                   |                        |                  | 0.009   |
| Mean (SD)                              | 8.1 (5.4)         | 6.5 (5.7)              | 6.7 (5.7)        |         |
| <b>Wealth Index quintile</b>           |                   |                        |                  | 0.744   |
| 1 (very poor)                          | 21 (21.4%)        | 133 (19.6%)            | 154 (19.8%)      |         |
| 2                                      | 17 (17.3%)        | 140 (20.6%)            | 157 (20.2%)      |         |
| 3                                      | 17 (17.3%)        | 141 (20.7%)            | 158 (20.3%)      |         |
| 4                                      | 23 (23.5%)        | 132 (19.4%)            | 155 (19.9%)      |         |
| 5 (least poor)                         | 20 (20.4%)        | 134 (19.7%)            | 154 (19.8%)      |         |

**Table S4:** Univariable linear regressions of participant and intervention characteristics on total RANAS score change from the pre to post tests. Positive estimates indicate an increase in the RANAS post-test score.

| Term                                                         | Estimate    | P value     |
|--------------------------------------------------------------|-------------|-------------|
| Number of visits from community-based surveillance volunteer | <b>0.10</b> | <b>0.02</b> |
| Religion: Non-Christian                                      | -0.77       | 0.42        |
| Participant's age                                            | 0.04        | 0.50        |
| Participant's years of education                             | -0.05       | 0.49        |

**Figure S2:** Time series of use over the entire study period, relative to date of enrollment, including imputed values. Dashed line = 6 months.

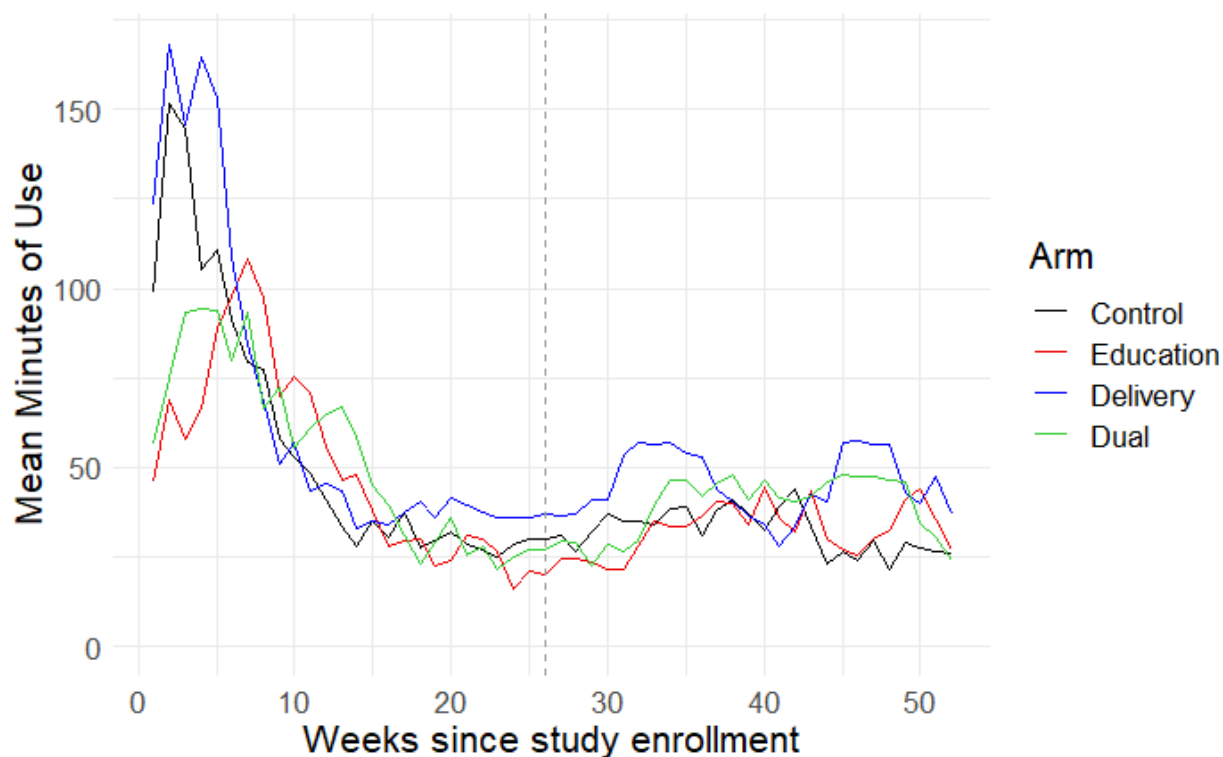

**Table S5:** Cost of a 14.5 kg cylinder refill at local refilling station.

| Month/Year     | LPG Price (GH¢) |
|----------------|-----------------|
| September 2017 | 65.00           |
| May 2018       | 69.00           |
| June 2018      | 70.00           |
| August 2018    | 72.00           |

**Table S6:** Subgroup analysis of treatment effect via log linear regression with interactions between socio-demographic variable (term) and treatment arm on cooking time in the final 6 months of ELAG. Values = point estimate (95% confidence intervals).

| Term                                    | Delivery           | Dual               | Education          |
|-----------------------------------------|--------------------|--------------------|--------------------|
| Participant's Age                       | -0.01 (-0.03-0.01) | -0.02 (-0.04-0.01) | 0 (-0.02-0.03)     |
| Asset index                             | -0.06 (-0.14-0.03) | 0.04 (-0.04-0.13)  | -0.04 (-0.12-0.04) |
| Ethnicity (reference = Akan)            |                    |                    |                    |
| Dagarti                                 | -0.01 (-0.63-0.61) | 0.53 (-0.21-1.27)  | -0.14 (-0.91-0.63) |
| Grushi                                  | 0.57 (-0.28-1.42)  | 0.34 (-0.78-1.45)  | -0.22 (-1.17-0.74) |
| Konkomba                                | -0.36 (-1.16-0.45) | 0.05 (-0.76-0.87)  | -1 (-1.89--0.11)   |
| Mo                                      | -0.17 (-1.17-0.84) | -0.17 (-1.33-0.98) | -0.39 (-1.53-0.74) |
| Other                                   | 0.23 (-0.54-1.01)  | 0.28 (-0.47-1.03)  | -0.17 (-1.03-0.7)  |
| Household Size (reference = 2-5 people) |                    |                    |                    |
| HHSIZE6-10 people                       | 0.25 (-0.13-0.62)  | 0.16 (-0.23-0.55)  | 0.25 (-0.14-0.65)  |
| HHSIZE>10 people                        | 0.26 (-0.33-0.86)  | 0.54 (-0.11-1.19)  | 0.36 (-0.22-0.95)  |
| Relationship Score                      | 0 (-0.04-0.03)     | 0 (-0.04-0.03)     | 0.01 (-0.03-0.04)  |
| Religion (reference = Christian)        |                    |                    |                    |
| Non-Christian                           | 0.13 (-0.27-0.52)  | -0.15 (-0.61-0.31) | -0.04 (-0.45-0.37) |
| Profession (reference = Professional)   |                    |                    |                    |
| Farmer/Domestic Worker                  | -0.09 (-0.63-0.44) | -1 (-3.12-1.13)    | -0.79 (-2.54-0.96) |
| Secretarial                             | -0.14 (-0.69-0.41) | -1.44 (-3.57-0.69) | -0.58 (-2.34-1.18) |
| Trader                                  | 0.69 (-0.21-1.6)   | -1.12 (-3.43-1.19) | 0.1 (-1.82-2.01)   |
| Unknown/No Response                     | NA                 | -0.68 (-2.86-1.5)  | -0.74 (-2.53-1.04) |
